# Supplementary material for: Maintenance Treatment for Patients With Bipolar I Disorder: Results From a North American Study of Quetiapine in Combination With Lithium or Divalproex (Trial 127)
Source: Atypon-hosted journal article supplement (doi:10.1176/appi.ajp.2008.08020189), 2009-03-17
Supplement: ajp_166_04_0476_01.pdf [file ajp_166_04_0476_01.pdf]

**TABLE S1. Hazard Ratios for Time to Recurrence of a Mood Event Stratified According to Lithium or Divalproex and Rapid-Cycling Disease Course (Intent-to-Treat Population)<sup>a</sup>**

| Parameter                       | Any Mood Event   |
|---------------------------------|------------------|
| Lithium                         |                  |
| Quetiapine (N=131)              | 35               |
| Placebo (N=134)                 | 70               |
| Hazard ratio (95% CI)           | 0.40 (0.27–0.61) |
| Divalproex                      |                  |
| Quetiapine (N=179)              | 28               |
| Placebo (N=179)                 | 93               |
| Hazard ratio (95% CI)           | 0.25 (0.16–0.38) |
| Rapid-cycling disease course    |                  |
| Quetiapine (N=153)              | 26               |
| Placebo (N=165)                 | 80               |
| Hazard ratio (95% CI)           | 0.30 (0.19–0.46) |
| No rapid-cycling disease course |                  |
| Quetiapine (N=156)              | 37               |
| Placebo (N=147)                 | 83               |
| Hazard ratio (95% CI)           | 0.32 (0.22–0.48) |

<sup>a</sup> Recurrence was defined as initiation of an antipsychotic, antidepressant, mood-stabilizing agent other than lithium or divalproex, anxiolytic other than lorazepam, or any other medication to treat a manic, depressed, or mixed event; hospitalization for a manic, depressed, or mixed event; total score  $\geq 20$  on the Young Mania Rating Scale or Montgomery-Åsberg Depression Rating Scale at two consecutive assessments or at the final assessment if the patient discontinues; or discontinuation from the study by the patient if, according to the investigator, the discontinuation was due to a mood event (manic, depressed, or mixed).

**TABLE S2: Summary of Secondary Efficacy Variables as Measured Prior to a Mood Event (ITT Population)**

| Outcome Measure                                                               | Quetiapine + Lithium or<br>Divalproex (N=310) Versus<br>Placebo + Lithium or Divalproex<br>(N=313) |       |         |
|-------------------------------------------------------------------------------|----------------------------------------------------------------------------------------------------|-------|---------|
|                                                                               | Estimated<br>Difference                                                                            | SE    | p       |
| Young Mania Rating Scale                                                      | -0.78                                                                                              | 0.185 | <0.0001 |
| Montgomery-Åsberg Depression<br>Rating Scale                                  | -0.86                                                                                              | 0.254 | 0.0008  |
| Clinical Global Impression–<br>Bipolar scale, severity of illness<br>subscale | -0.14                                                                                              | 0.039 | 0.0003  |
| Clinical Global Impression–<br>Bipolar scale, global<br>improvement subscale  | -0.05                                                                                              | 0.094 | 0.5650  |
| Positive and Negative Syndrome<br>Scale, positive subscale                    | -0.18                                                                                              | 0.093 | 0.0521  |
| Sheehan Disability Scale <sup>a</sup><br>(observed case data)                 | -0.50                                                                                              | 0.482 | 0.3017  |
| Psychological General Well-Being<br>Scale                                     | 1.12                                                                                               | 1.004 | 0.2664  |

<sup>a</sup> The mean change in score from randomization up to but excluding the first assessment was analyzed using analysis of covariance. All other secondary efficacy outcomes were analyzed using repeated-measures mixed models.
